# Supplementary material for: Genetic diversity of native and cultivated Ugandan Robusta coffee (Coffea canephora Pierre ex A. Froehner): Climate influences, breeding potential and diversity conservation
Source: PubMed Central journal article supplement (PMC7870046; doi:10.1371/journal.pone.0245965), 2021-02-08

**Supplementary Figure S2.** Optimal number of genetic clusters in the wild Ugandan *C. canephora* set according to the admixture model with correlated alleles implemented in Structure. a The log-likelihood of the data [ $\ln P(X)$ ] averaged over 10 consecutive Structure runs for  $K = 2$  to  $7$ , with error bars representing  $\pm$  standard deviation. b Evanno's  $\Delta K$  statistic plotted against  $K$ .

Structure analysis revealed a maximum  $\Delta K$  value for  $K = 3$  suggesting the split into three main clusters, but it is worth noting that for  $K = 4$ ,  $\Delta K$  value is above zero indicating that the genetic structure produced by dividing all genotypes into 4 groups is also likely.

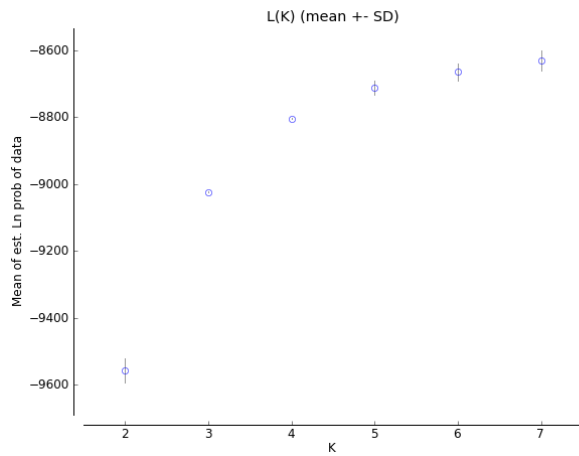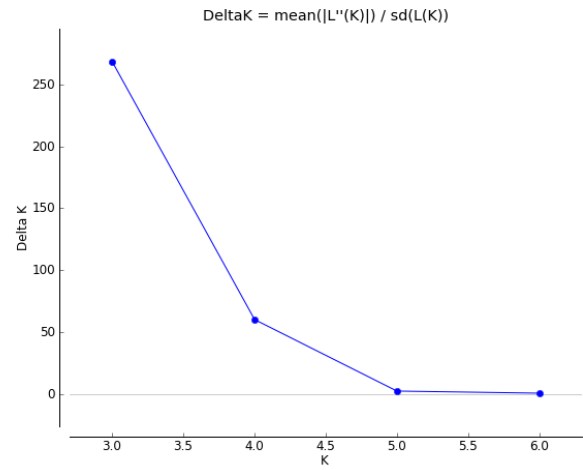

Supplement: pone.0245965.s002.pdf [file pone.0245965.s002.pdf]
