# Supplementary material for: Genetic diversity of native and cultivated Ugandan Robusta coffee (Coffea canephora Pierre ex A. Froehner): Climate influences, breeding potential and diversity conservation
Source: PubMed Central journal article supplement (PMC7870046; doi:10.1371/journal.pone.0245965), 2021-02-08

**Supplementary Figure S5.** Isolation by distance (IBD): Correlation between the pairwise genetic distances of Ugandan *C. canephora* wild individuals with pairwise geographical distances (Mantel test with 999 permutations at p=0.01).

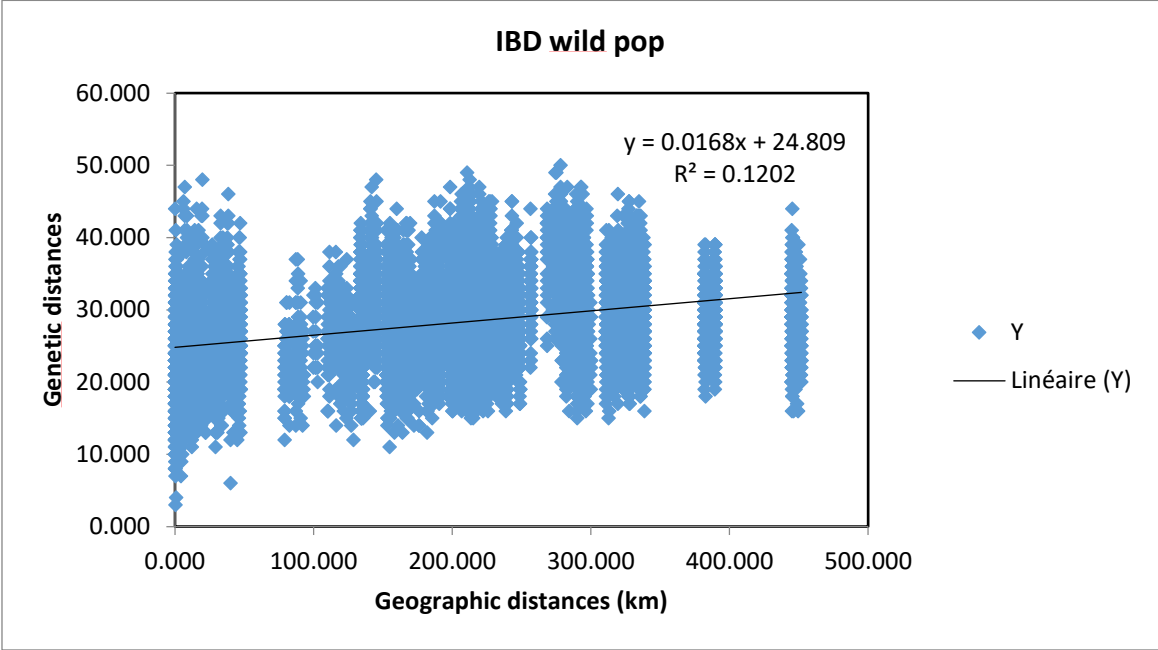

Supplement: pone.0245965.s005.pdf [file pone.0245965.s005.pdf]
