# Supplementary material for: Genetic diversity of native and cultivated Ugandan Robusta coffee (Coffea canephora Pierre ex A. Froehner): Climate influences, breeding potential and diversity conservation
Source: PubMed Central journal article supplement (PMC7870046; doi:10.1371/journal.pone.0245965), 2021-02-08
Supplement: pone.0245965.s008.pdf [file pone.0245965.s008.pdf]

**Supplementary Table S2.** Representative individuals from the *C. canephora* genetic groups defined by Mérot-L'Anthoene et al. (2019) and their origins. Group O individuals are in common with the present study: MB3.1, ML5.1 and ZK2.5.

| Genetic group | No        | Status | Country                          | Collection | No |
|---------------|-----------|--------|----------------------------------|------------|----|
| A             | 4         | Wild   | Congo                            | CNRA       | 3  |
|               |           |        | Gabon                            | Meise      | 1  |
| B             | 8         | Wild   | Central African Republic         | CNRA       | 3  |
|               |           |        | "                                | IRD        | 3  |
|               |           |        | Democratic Republic of the Congo | Meise      | 2  |
| C             | 6         | Wild   | Cameroon                         | CNRA       | 4  |
|               |           |        | Congo                            | CNRA       | 1  |
|               |           |        | Central African Republic         | CNRA       | 1  |
| D             | 9         | Wild   | Côte d'Ivoire                    | CNRA       | 8  |
|               |           |        | Republic of Guinea               | CNRA       | 1  |
| E             | 23        | Wild   | Cameroon                         | Meise      | 1  |
|               |           |        | "                                | CNRA       | 4  |
|               |           |        | Congo                            | CNRA       | 7  |
|               |           |        | Côte d'Ivoire                    | CNRA       | 3  |
|               |           |        | Central African Republic         | CNRA       | 2  |
|               |           |        | Democratic Republic of the Congo | Meise      | 2  |
|               |           |        |                                  | ICCRI      | 4  |
| G             | 6         | Wild   | Angola                           | INCA       | 6  |
| R             | 6         | Wild   | Democratic Republic of the Congo | ICCRI      | 6  |
| O             | 3         | Wild   | Uganda                           | NARO       | 3  |
| <b>Total</b>  | <b>65</b> |        |                                  |            |    |

CNRA: Centre national de recherche agronomique, Côte d'Ivoire ; Meise : Meise Botanic Garden, Belgium ; INCA: Instituto Nacional do Café, Angola ; ICCRI: Indonesian Coffee and Cocoa Research Institute, Indonesia ; NARO: National Agricultural Research Organization.
