# Supplementary material for: Genetic diversity of native and cultivated Ugandan Robusta coffee (Coffea canephora Pierre ex A. Froehner): Climate influences, breeding potential and diversity conservation
Source: PubMed Central journal article supplement (PMC7870046; doi:10.1371/journal.pone.0245965), 2021-02-08
Supplement: pone.0245965.s009.pdf [file pone.0245965.s009.pdf]

**Supplementary Table S3.** Description of the 19 SSR markers used for DNA fingerprinting of the Ugandan coffee samples, including their forward and reverse primer sequences, repeat motif, annealing temperature (T<sub>m</sub>), expected amplicon size and multiplex set. The linkage group (LG) and chromosome (Chr.) of *C. canephora* belonging are indicated (except nd: not determined). Complementary information can be found in MoccaDB (<http://moccadb.ird.fr/>) and in the coffee genome hub (<http://coffee-genome.org/>).

| Marker | Primer code | Forward Primer        | Reverse Primer         | Repeat motif                          | T <sub>m</sub> (°C) | Size (bp) | Multiplex set | MoccaDB code | LG | Chr. |
|--------|-------------|-----------------------|------------------------|---------------------------------------|---------------------|-----------|---------------|--------------|----|------|
| R338   | R338        | CGAAGGCTGTCAACAACCTGG | GGGATAAACAAGTTAAAGGA   | (GA) <sub>17</sub>                    | 60                  | 241       | 1             | nd           | E  | 5    |
| SSR146 | 122850      | TCCAGTTTGATCAGCAACCA  | CCATCTTGGGGATAGAGCAA   | (GA) <sub>16</sub>                    | 60                  | 153       | 1             | nd           | F  | 6    |
| R278   | R278        | TGTAGATTTGAAACCAATC   | AAGTCTCGACAAGTTTGTAC   | (GA) <sub>16</sub>                    | 60                  | 143       | 1             | R278         | E  | 5    |
| R339   | R339        | ATTATGCTCGCTGGGCTGTT  | TGGGATCACTCCTGTGTCGC   | (CT) <sub>9</sub>                     | 60                  | 218       | 1             | R339         | G  | 7    |
| R336   | R336        | TTGCCTTTTTAGTGCCTGTA  | GCAAAGCCCGAGGATT       | (GA) <sub>4</sub>                     | 60                  | 177       | 1             | nd           | A  | 1    |
| R325   | R325        | CCTTGTTGTTGGGAATGTC   | GGCTGTTCTGGGCTTTGTG    | (GA) <sub>23</sub>                    | 60                  | 254       | 2             | R325         | F  | 6    |
| SSR196 | 124195      | ATCCCCATCAGAAGACCTCA  | CCTCCACCGCTGTTTATTA    | (GCCA) <sub>6</sub>                   | 60                  | 88        | 2             | nd           | C  | 3    |
| R301   | R301        | CTCACCCAGCATTTAGAGT   | GTTATTTGCCCCATCAGG     | (GA) <sub>15</sub>                    | 60                  | 257       | 2             | R301         | D  | 4    |
| R268   | R268        | GTATCCCACAATGAAATCAC  | AGTAGAATTTTCAACATATAAG | (GA) <sub>19</sub>                    | 60                  | 155       | 2             | R268         | G  | 7    |
| R168   | R168        | CCTGGACTGGTAGAAACAAA  | AAAGGTGTTCAATGCCTACA   | (GA) <sub>18</sub>                    | 60                  | 265       | 2             | R168         | A  | 1    |
| R189   | R189        | GGAGTGAGAGGAGGGCGTAG  | GAGAGAGGGACTGCTGC      | (GCA) <sub>9</sub> (GA) <sub>15</sub> | 60                  | 235       | 3             | R189         | F  | 6    |
| SSR495 | 124161      | TCGGCTCCCAAATATTCATC  | CATGAGGCAAGAGGGTTTGT   | (GA) <sub>5</sub>                     | 60                  | 164       | 3             | ssr124161    | A  | 1    |
| SSR497 | 123909      | AGGCTTGCTGGAACCTTGA   | GAAAGACTTGCTCTTTGCCG   | (GA) <sub>14</sub>                    | 60                  | 266       | 3             | ssr123909    | B  | 2    |
| R175   | R175        | GCACTGACGCAGCAATG     | AAAAGGAGAGCCAAAGCAGT   | (GA) <sub>20</sub>                    | 60                  | 234       | 3             | R175         | F  | 6    |
| R250   | R250        | GATCATTGGGTTGGTGG     | CGACTTCCGCACGCAAAC     | (GA) <sub>17</sub>                    | 60                  | 227       | 4             | R250         | I  | 9    |
| R148   | R148        | CGTCGTTGAGGACTTGTTCC  | TTCGCAATCCCAGACCC      | (GA) <sub>10</sub> (GAT) <sub>8</sub> | 60                  | 198       | 4             | R148         | D  | 4    |
| SSR209 | 119699      | GCCGTGGTGAAGATGTA     | CGAGTTCACCAAGAACGTC    | (AT) <sub>5</sub>                     | 60                  | 100       | 4             | ssr119699    | A  | 1    |
| R342   | R342        | GCGAGAATAAGGAGTGACC   | GTCCCTTTTTGTCTGGACC    | (GA) <sub>9</sub>                     | 60                  | 151       | 4             | nd           | G  | 7    |
| SSR533 | 123557      | ATCTCCTCGTTCTTCCCAT   | GCTTGTAGCAGGCAGGAAAC   | (GA) <sub>8</sub>                     | 60                  | 233       | 4             | ssr123557    | B  | 2    |
