# Supplementary material for: Genetic diversity of native and cultivated Ugandan Robusta coffee (Coffea canephora Pierre ex A. Froehner): Climate influences, breeding potential and diversity conservation
Source: PubMed Central journal article supplement (PMC7870046; doi:10.1371/journal.pone.0245965), 2021-02-08
Supplement: pone.0245965.s010.pdf [file pone.0245965.s010.pdf]

**Supplementary Table S4.** Environmental variables. The 19 bioclimatic (BIOx) variables averaged for the years 1950-2000 were downloaded from WorldClim database ([www.worldclim.org](http://www.worldclim.org)) at 30 arc-second resolution. Elevation was determined in the field by GPS (Garmin eTrex 10 Navigation device). The aridity index (AI) and potential evapotranspiration (PET) data were sourced from the Global-Aridity dataset.

| <b>Environmental variables</b>               | <b>Abbreviation</b> |
|----------------------------------------------|---------------------|
| Annual mean temperature (°C)                 | BIO1                |
| Mean diurnal range (°C)                      | BIO2                |
| Isothermality (BIO2/BIO7) (* 100) (°C)       | BIO3                |
| Temperature seasonality (°C)                 | BIO4                |
| Max temperature of the warmest month (°C)    | BIO5                |
| Min temperature of the coldest month (°C)    | BIO6                |
| Temperature annual range (BIO5-BIO6) (°C)    | BIO7                |
| Mean temperature of the wettest quarter (°C) | BIO8                |
| Mean temperature of the driest quarter (°C)  | BIO9                |
| Mean temperature of the warmest quarter (°C) | BIO10               |
| Mean temperature of the coldest quarter (°C) | BIO11               |
| Annual precipitation (mm)                    | BIO12               |
| Precipitation of the wettest month (mm)      | BIO13               |
| Precipitation of the driest month (mm)       | BIO14               |
| Precipitation seasonality (mm)               | BIO15               |
| Precipitation of the wettest quarter (mm)    | BIO16               |
| Precipitation of the driest quarter (mm)     | BIO17               |
| Precipitation of the warmest quarter (mm)    | BIO18               |
| Precipitation of the coldest quarter (mm)    | BIO19               |
| Elevation (m.a.s.l.: meter above sea level)  | ALT                 |
| Aridity index                                | AI                  |
| Potential evapotranspiration                 | PET                 |
