# Supplementary material for: Genetic diversity of native and cultivated Ugandan Robusta coffee (Coffea canephora Pierre ex A. Froehner): Climate influences, breeding potential and diversity conservation
Source: PubMed Central journal article supplement (PMC7870046; doi:10.1371/journal.pone.0245965), 2021-02-08
Supplement: pone.0245965.s011.pdf [file pone.0245965.s011.pdf]

**Supplementary Table S5.** Differentiation ( $F_{st}$ ) between native sites.  $F_{st}$  values are below the diagonal, and probabilities, *i.e.*  $P(\text{rand} \geq \text{data})$  based on 999 permutations, are shown above the diagonal.

|             |             | Southern-central (SC)-forests |        |             | North-western (NW)- forests |        |         |       |
|-------------|-------------|-------------------------------|--------|-------------|-----------------------------|--------|---------|-------|
|             |             | Kalangala                     | Mabira | Malabigambo | Kibale                      | Itwara | Budongo | Zoka  |
| SC-forests  | Kalangala   |                               | 0.045  | 0.011       | 0.001                       | 0.001  | 0.001   | 0.001 |
|             | Mabira      | 0.018                         |        | 0.001       | 0.001                       | 0.001  | 0.001   | 0.001 |
|             | Malabigambo | 0.036                         | 0.053  |             | 0.001                       | 0.001  | 0.001   | 0.001 |
| NW- forests | Kibale      | 0.216                         | 0.205  | 0.170       |                             | 0.001  | 0.001   | 0.001 |
|             | Itwara      | 0.216                         | 0.176  | 0.145       | 0.150                       |        | 0.001   | 0.001 |
|             | Budongo     | 0.115                         | 0.119  | 0.084       | 0.127                       | 0.152  |         | 0.001 |
|             | Zoka        | 0.112                         | 0.099  | 0.095       | 0.149                       | 0.180  | 0.055   |       |
