# Supplementary material for: Genetic diversity of native and cultivated Ugandan Robusta coffee (Coffea canephora Pierre ex A. Froehner): Climate influences, breeding potential and diversity conservation
Source: PubMed Central journal article supplement (PMC7870046; doi:10.1371/journal.pone.0245965), 2021-02-08
Supplement: pone.0245965.s012.pdf [file pone.0245965.s012.pdf]

**Supplementary Table S6** Pairwise *t*-test results to test differences between locations across locations of variables

| <b>Elevation (m.a.s.l.)</b>                |              |              |              |        |        |             |
|--------------------------------------------|--------------|--------------|--------------|--------|--------|-------------|
|                                            | Budongo      | Itwara       | Kalangala    | Kibale | Mabira | Malabigambo |
| Itwara                                     | 0.000        |              |              |        |        |             |
| Kalangala                                  | 0.000        | 0.000        |              |        |        |             |
| Kibale                                     | 0.000        | 0.000        | 0.000        |        |        |             |
| Mabira                                     | 0.000        | 0.000        | <b>0.480</b> | 0.000  |        |             |
| Malabigambo                                | 0.000        | 0.000        | 0.000        | 0.000  | 0.000  |             |
| Zoka                                       | 0.000        | 0.000        | 0.000        | 0.000  | 0.000  | 0.000       |
| <b>Annual mean temperature (°C) - BIO1</b> |              |              |              |        |        |             |
|                                            | Budongo      | Itwara       | Kalangala    | Kibale | Mabira | Malabigambo |
| Itwara                                     | 0.000        |              |              |        |        |             |
| Kalangala                                  | 0.000        | 0.000        |              |        |        |             |
| Kibale                                     | 0.000        | 0.000        | 0.000        |        |        |             |
| Mabira                                     | 0.000        | 0.000        | 0.000        | 0.000  |        |             |
| Malabigambo                                | 0.000        | 0.000        | 0.000        | 0.000  | 0.000  |             |
| Zoka                                       | 0.000        | 0.000        | 0.000        | 0.000  | 0.000  | 0.000       |
| <b>Annual precipitation (mm) - BIO12</b>   |              |              |              |        |        |             |
|                                            | Budongo      | Itwara       | Kalangala    | Kibale | Mabira | Malabigambo |
| Itwara                                     | 0.000        |              |              |        |        |             |
| Kalangala                                  | 0.000        | 0.000        |              |        |        |             |
| Kibale                                     | 0.003        | 0.000        | 0.000        |        |        |             |
| Mabira                                     | 0.000        | 0.000        | 0.000        | 0.000  |        |             |
| Malabigambo                                | 0.000        | 0.786        | 0.000        | 0.000  | 0.013  |             |
| Zoka                                       | 0.000        | 0.000        | 0.000        | 0.957  | 0.000  | 0.000       |
| <b>Potential evapotranspiration (PET)</b>  |              |              |              |        |        |             |
|                                            | Budongo      | Itwara       | Kalangala    | Kibale | Mabira | Malabigambo |
| Itwara                                     | 0.000        |              |              |        |        |             |
| Kalangala                                  | 0.000        | 0.000        |              |        |        |             |
| Kibale                                     | 0.000        | 0.000        | 0.000        |        |        |             |
| Mabira                                     | 0.000        | 0.000        | 0.000        | 0.002  |        |             |
| Malabigambo                                | 0.000        | <b>0.858</b> | 0.000        | 0.000  | 0.000  |             |
| Zoka                                       | 0.000        | 0.000        | 0.000        | 0.000  | 0.000  | 0.000       |
| <b>Aridity index (AI)</b>                  |              |              |              |        |        |             |
|                                            | Budongo      | Itwara       | Kalangala    | Kibale | Mabira | Malabigambo |
| Itwara                                     | 0.000        |              |              |        |        |             |
| Kalangala                                  | 0.000        | 0.000        |              |        |        |             |
| Kibale                                     | <b>0.213</b> | 0.000        | 0.000        |        |        |             |
| Mabira                                     | 0.000        | 0.000        | 0.000        | 0.000  |        |             |
| Malabigambo                                | 0.000        | <b>0.690</b> | 0.000        | 0.000  | 0.000  |             |
| Zoka                                       | 0.000        | 0.000        | 0.000        | 0.000  | 0.000  | 0.000       |

Values in the table are *p* values of pairwise comparisons of locations. Significant differences are indicated when  $p < 0.05$  and non-significant differences are in bold and italics.
